# Supplementary material for: Study on launch scheme of space-net capturing system
Source: PLoS One. 2017 Sep 6;12(9):e0183770. doi: 10.1371/journal.pone.0183770 (PMC5587241; doi:10.1371/journal.pone.0183770)
Supplement: S2 Table — (XLSX) [file pone.0183770.s002.xlsx]

## Sheet: Ball-fallng test
Time(s)	Height(m)
0	1
0.5	0
0.732	0.3089
1	0
1.155	0.1307
1.325	0
1.446	0.06256
1.55	0
1.642	0.03256
1.785	0.01588
1.887	0.007602
1.989	0
2.091	0
2.193	0
2.295	0
2.397	0
2.499	0
